# Supplementary material for: The Invisibility of the Multiply Stigmatized Patient: Intersections of Ethnic Prejudice and Stigma of Chronic Disease in Medical Students
Source: Springer Nature journal article supplement (doi:10.1007/s40615-024-02272-x), 2025-01-16
Supplement: MOESM1 [file 40615_2024_2272_MOESM1_ESM.docx]

**Supplementary Material.S1.**

**Instructions**: The following vignettes describe the cases of two patients. Please read the vignettes carefully and respond to the subsequent questions by selecting the answer that best approximates your experience.

| **Patient with Chronic Psoriasis** |
| --- |
|  |
| Andrea, a 35-year-old Italian man (or Ahaad, a 35-year-old migrant) presents to the clinic with white scaly papules and plaques on his elbows, extensor arms, knees, and shins. In the past month, these lesions have become much worse and have started to appear on his waist and hip as well as on his face. Scaly and flaky eruptions are also present on his scalp, ears, and eyebrows. He describes the lesions as being itchy and irritating. |

| **Patient with Chronic Gastrointestinal Disease** |
| --- |
|  |
| Mario, a 33-year-old Italian (or Abdul, a 33-year-old migrant) presents to the clinic for management of uninvestigated crampy lower abdominal pain. In the past month he has had diarrhea, and bloating is troubling him. The pain occurs frequently after meals and is often relieved for a few minutes by defecation; loose stools are common with pain. He has no other red flags, no weight loss, vomiting, bleeding, or other worrying symptoms. |

| **Patient with Chronic Obesity** |
| --- |
|  |
| Luca, a 35-year-old Italian man (or Abbas, a 35-year-old migrant) with (BMI 37) approaches the clinic due to difficulty of breathing and feeling always out breath even when engaging in low intensity physical activity. The last couple of weeks the patient reports feeling pain at the articulations and in the knees and back area. Often climbing up a flight of stairs is very difficult and is associated with shortness of breath. |

| **Patient with Chronic Depression** |
| --- |
|  |
| Davide, a 35-year-old Italian man (or Hamdi, a 35-year-old migrant) reports in the clinic because for the last several weeks, has been waking up before the alarm clock in the morning with a sad mood and a heavy feeling that sticks around all day long. The patient reports crying continuously without any apparent motive, feeling out of energy, out of steam, and not able to bring himself to perform even the normal activities of everyday life. |

| **Patient with Chronic Lung Cancer** |
| --- |
|  |
| Alessandro, a 35-year-old Italian man (or Rasheed a 35-year-old migrant) presents to the clinic because of feelings of fatigue and progressive dyspnea for several weeks. Climbing a flight of stairs is associated with shortness of breath and a sense of tiredness. He was diagnosed with lung cancer 3 years ago and his last chest X-ray showed a left malignant pleural effusion and enlargement of the right mediastinal and hilar lymph nodes. |

**1.** Would you like to take care of this patient?

not at all a little to some extent to a great extent very much

**2.** What emotion do you feel when you imagine yourself as the doctor taking care of this patient?

curiosity compassion pity fear disgust

**3.** Taking care of this patient would make you feel uncomfortable?

not at all a little to some extent to a great extent very much

**4.** If you were given the chance would you rather avoid taking charge of this patient?

not at all a little to some extent to a great extent very much

**5.** In your opinion, what is the likelihood the disease was caused by genetic factors?

very low low neither low, nor high high very high

**6.** What is the likelihood the disease was caused by bad character or unhealthy attitudes of the patient?

very low low neither low, nor high high very high

**7.**  What is the likelihood the disease was caused by chance?

very low low neither low, nor high high very high

**8.**  Do you think the patient would feel the need to hide his condition to others?

not at all a little to some extent to a great extent very much

**9.**  Revealing his condition to other people would be embarrassing for this patient?

not at all a little to some extent to a great extent very much

**10.** Telling others about his condition would elicit negative judgments and attitudes?

not at all a little to some extent to a great extent very much
