# Supplementary material for: The Invisibility of the Multiply Stigmatized Patient: Intersections of Ethnic Prejudice and Stigma of Chronic Disease in Medical Students
Source: Springer Nature journal article supplement (doi:10.1007/s40615-024-02272-x), 2025-01-16
Supplement: MOESM2 [file 40615_2024_2272_MOESM2_ESM.docx]

**Supplementary Material S2**

***Gender***

The preliminary analysis revealed significant gender differences for disease onset variables for psoriasis, depression, irritable bowel disease (IBS), and cancer, but not for obesity. Specifically, male participants (M=1.93, SE=0.8) reported higher levels of avoidance in taking care of a patient with psoriasis compared to female participants (M=1.93, SE=0.8); *F*(1, 663) = 3.999, *p* = .046, η2 = .006. Male participants also made significantly higher attributions of disease onset to personal causes (M=2.43, SE=0.9), compared to females (M=2.24, SE=0.8); *F*(1, 663) = 6.743, *p* = .010, η2 = .010. This was also the case for depression, with male participants reporting significantly higher attributions of disease onset to personal causes (M=3.20, SE=1.0), compared to females (M=3.01, SE=0.9); *F*(1, 663) = 6.318, *p* = .012, η2 = .010; and cancer: male participants reported significantly higher attributions of disease onset to personal causes (M=3.53, SE=0.8), compared to females (M=3.23, SE=0.8); *F*(1, 663) = 18.811, *p* < .001, η2 = .028. Similarly, in the case of irritable bowel disease (IBS), male participants made significantly higher attributions of disease onset to personal causes (M=2.93, SE=0.5) and genetic factors (M=3.05, SE=0.4) compared to females (M=2.74, SE=0.4 and M=2.91, SE=0.4, respectively (all *p*s <0.03).

The analysis of emotional reactions showed that compared to male students (33.3 %) females reported more frequently compassion (41%) towards a patient with IBS, *z* = 2.101, *p* = .035. They also reported more fear towards a patient with cancer (14%) compared to males (7%), *z* = 2.841, *p* = .004.

No other significant differences emerged on other variables across conditions.

***Intergroup Anxiety (IAS)***

The analysis of intergroup anxiety (IAS) scores revealed significant differences between participants in the high compared to low IAS levels across diseases.

For psoriasis, participants high in IAS reported lower caretaking willingness (M=2.81, SE=0.9) and higher avoidance in taking care of the patient (M=2.00, SE=0.8), compared to those in the low IAS group (M=2.95, SE=0.9 and (M=1.74, SE=0.8, respectively); *F*(1, 663) = 3.678, *p* = .050, η2 = .006 and *F*(1, 663) = 15.218, *p* < .001, η2 = .023. They also reported significantly higher attributions of disease onset to personal causes (M=2.39, SE=0.8) compared to low IAS participants (M=2.25, SE=0.9),; *F*(1, 663) = 3.807, *p* = .051, η2 = .006.

For depression, participants high in IAS reported lower level of caretaking willingness (M=3.43, SE=0.5), higher avoidance in taking care of the patient (M=1.82, SE=0.4), and higher discomfort (M=1.79, SE=0.4), compared to those in the low IAS group (M=3.90, SE=0.5; M=1.52, SE=0.4 and M=1.51, SE=0.5, respectively); *F*(1, 663) = 40.738, *p* < .001, η2 = .058, *F*(1, 663) = 25.315, *p* < .001, η2 = .037 and *F*(1, 663) = 18.086, *p* < .001, η2 = .027. They also reported significantly higher attributions of disease onset to personal causes (M=3.20, SE=0.5) compared to low IAS participants (M=2.98, SE=0.5); *F*(1, 663) = 8.765, *p* = .003, η2 = .013 and reported patients would be tendentially less reluctant to disclose their disease to others (M=3.82, SE=0.5) compared to low IAS participants (M=4.02, SE=0.5); *F*(1, 663) = 7.514, *p* = .006, η2 = .011.

In the case of obesity, those in the high IAS group reported less caretaking willingness (M=3.09, SE=0.9), higher avoidance in taking care of the patient (M=1.66, SE=0.7), and higher discomfort (M=1.97, SE=0.9), compared to those in the low IAS group (M=3.22, SE=0.9; M=1.45, SE=0.6 and M=1.71, SE=1.0, respectively); *F*(1, 663) = 8.276, *p* = .004, η2 = .012, *F*(1, 663) = 14.490, *p* < .001, η2 = .022 and *F*(1, 663) = 11.649, *p* = .001, η2 = .017.

For patients with cancer, participants high in IAS reported lower levels of caretaking willingness (M=3.62, SE=0.5), higher avoidance in taking care of the patient (M=1.97, SE=0.5), and higher discomfort (M=1.71, SE=0.5), compared to those in the low IAS group (M=3.81, SE=0.5; M=1.73, SE=0.5 and M=1.54, SE=0.5, respectively); *F*(1, 663) = 5.878, *p* = .016, η2 = .009, *F*(1, 663) = 12.084, *p* = .001, η2 = .018 and *F*(1, 663) = 5.432, *p* = .020, η2 = .008. They also reported significantly higher attributions of disease onset to chance (M=2.53, SE=0.6) compared to low IAS participants (M=2.34, SE=0.6); *F*(1, 663) = 4.833, *p* = .028, η2 = .007.

Lastly, for a patient with IBS, those in the high IAS group reported higher avoidance (M=1.69, SE=0.6), and higher discomfort in taking care of the patient (M=1.86, SE=0.9), compared to those in the low IAS group (M=1.46, SE=0.6 and M=1.67, SE=8.8, respectively); *F*(1, 663) = 19.596, *p* < .001, η2 = .029 and *F*(1, 663) = 7.312, *p* = .007, η2 = .011.

The analysis of emotional reactions showed those in the low IAS group reported more frequent curiosity for a patient with depression (30.3%) compared to those in the high IAS group (23.4%), *z* = 2.027, *p* = .042. Also, for depression, pity was more frequently reported by those with high IAS (19 %) compared to those with low IAS levels (10 %), *z* = -3.296, *p <* .001.

No other significant differences emerged on other variables across conditions.
