# Supplementary material for: The Invisibility of the Multiply Stigmatized Patient: Intersections of Ethnic Prejudice and Stigma of Chronic Disease in Medical Students
Source: Springer Nature journal article supplement (doi:10.1007/s40615-024-02272-x), 2025-01-16
Supplement: MOESM3 [file 40615_2024_2272_MOESM3_ESM.docx]

| **Table 2**. Means (SE) and N(Percentages) | |  |  |  |  | |
| --- | --- | --- | --- | --- | --- | --- |
| a. | **White Italian Patient** | | | | | |
|  | *Depression* | *Obesity* | *Psoriasis* | *IBS* | *Lung cancer* | |
| *Emotional Reactions N (%)* |  |  |  |  |  | |
| Curiosity | 90 (26) | 87 (26.4) | 106 (30.6) | 145 (43.5) | 73 (23) | |
| Compassion | 193 (55.8) | 157 (48.8) | 168 (48.6) | 121 (36.3) | 152 (47.9) | |
| Pity | 48 (13.9) | 47 (14.2) | 18 (5.2) | 20 (6) | **46 (14.5)** | |
| Fear | 11 (3.2) | **2 (0.6)** | 2 (0.6) | 2 (0.6) | 42 (13.2) | |
| Disgust | 0 (0) | **4 (1.2)** | **33 (9.5)** | 12 (3.6) | 1 (0.2) | |
| Indifference | 4 (1.2) | 29 (8.8) | 19 (5.5) | 33 (9.9) | 3 (0.9) | |
| *Disease Origin Attributions* |  |  |  |  |  | |
| Genetic factors | 2.19 (0.04) | 2.69 (0.04) | 3.31 (0.05) | 2.96 (0.04) | 3.03 (0.04) | |
| Behavioral factors | 3.10 (0.05) | 4.23 (0.04) | 2.29 (0.05) | 2.82 (0.04) | | 3.40 (0.05) |
| Chance | **2.12 (0.06)** | 1.74 (0.04) | 2.33 (0.06) | 2.09 (0.05) | | 2.37 (0.06) |
| *Caretaking variables* |  |  |  |  |  | |
| Caretaking Willingness | 3.70 (0.05) | 3.14 (0.05) | 2.93 (0.05) | **3.16 (0.05)** | 3.73 (0.05) | |
| Caretaking Discomfort | 1.63 (0.04) | 1.57 (0.04) | 1.83 (0.04) | 1.56 (0.04) | **1.92 (0.05)** | |
| Caretaking Avoidance | 1.60 (0.04) | 1.78 (0.05) | 1.96 (0.06) | 1.75 (0.05) | **1.69 (0.05)** | |
| b. | **Middle Eastern Migrant Patient** | | | | | |
|  | *Depression* | *Obesity* | *Psoriasis* | *IBS* | *Lung cancer* | |
| *Emotional Reactions N (%)* |  |  |  |  |  | |
| Curiosity | 89 (28) | 83 (24.9) | 89 (28) | 143 (43.2) | 74 (21.3) | |
| Compassion | 169 (53.1) | 155 (46.4) | 146 (45.9) | 131 (39.6) | 165 (47.6) | |
| Pity | 46 (14.5) | 51 (15.3) | 19 (6) | 16 (4.8) | **71 (20.5)** | |
| Fear | 7 (2.2) | **4 (1.2)** | 1 (0.3) | 2 (0.6) | 32 (9.2) | |
| Disgust | 0 (0) | **9 (2.7)** | **50 (15.7)** | 10 (3) | 0 (0) | |
| Indifference | 7 (2.2) | 32 (9.6) | 13 (4.1) | 29 (8.8) | 5 (1.4) | |
| *Disease Origin Attributions* |  |  |  |  |  | |
| Genetic factors | 2.16 (0.04) | 2.66 (0.04) | 3.23 (0.05) | 2.98 (0.04) | 2.96 (0.04) | |
| Behavioral factors | 3.08 (0.05) | 4.21 (0.04) | 2.38 (0.05) | 2.82 (0.04) | 3.32 (0.05) | |
| Chance | **2.30 (0.06)** | 1.72 (0.04) | 2.18 (0.06) | 2.12 (0.05) | 2.51 (0.06) | |
| *Caretaking variables* |  |  |  |  |  | |
| Caretaking Willingness | 3.67 (0.05) | 3.09 (0.05) | 2.85 (0.05) | **3.03 (0.05)** | 3.73 (0.05) | |
| Caretaking Discomfort | 1.71 (0.04) | 1.52 (0.03) | 1.90 (0.05) | 1.58 (0.04) | **1.77 (0.05)** | |
| Caretaking Avoidance | 1.69 (0.05) | 1.87 (0.05) | 2.10 (0.06) | 1.76 (0.05) | **1.54 (0.05)** | |
| *Note*: Values in bold indicate significantdifferences in reported scores for White Italian patients compared to Middle Eastern migrants, at *p* < 0.05. | | | | | | |
